# Supplementary material for: The Light Responsive Transcriptome of the Zebrafish: Function and Regulation
Source: PubMed Central journal article supplement (PMC3039656; doi:10.1371/journal.pone.0017080), 2011-02-15

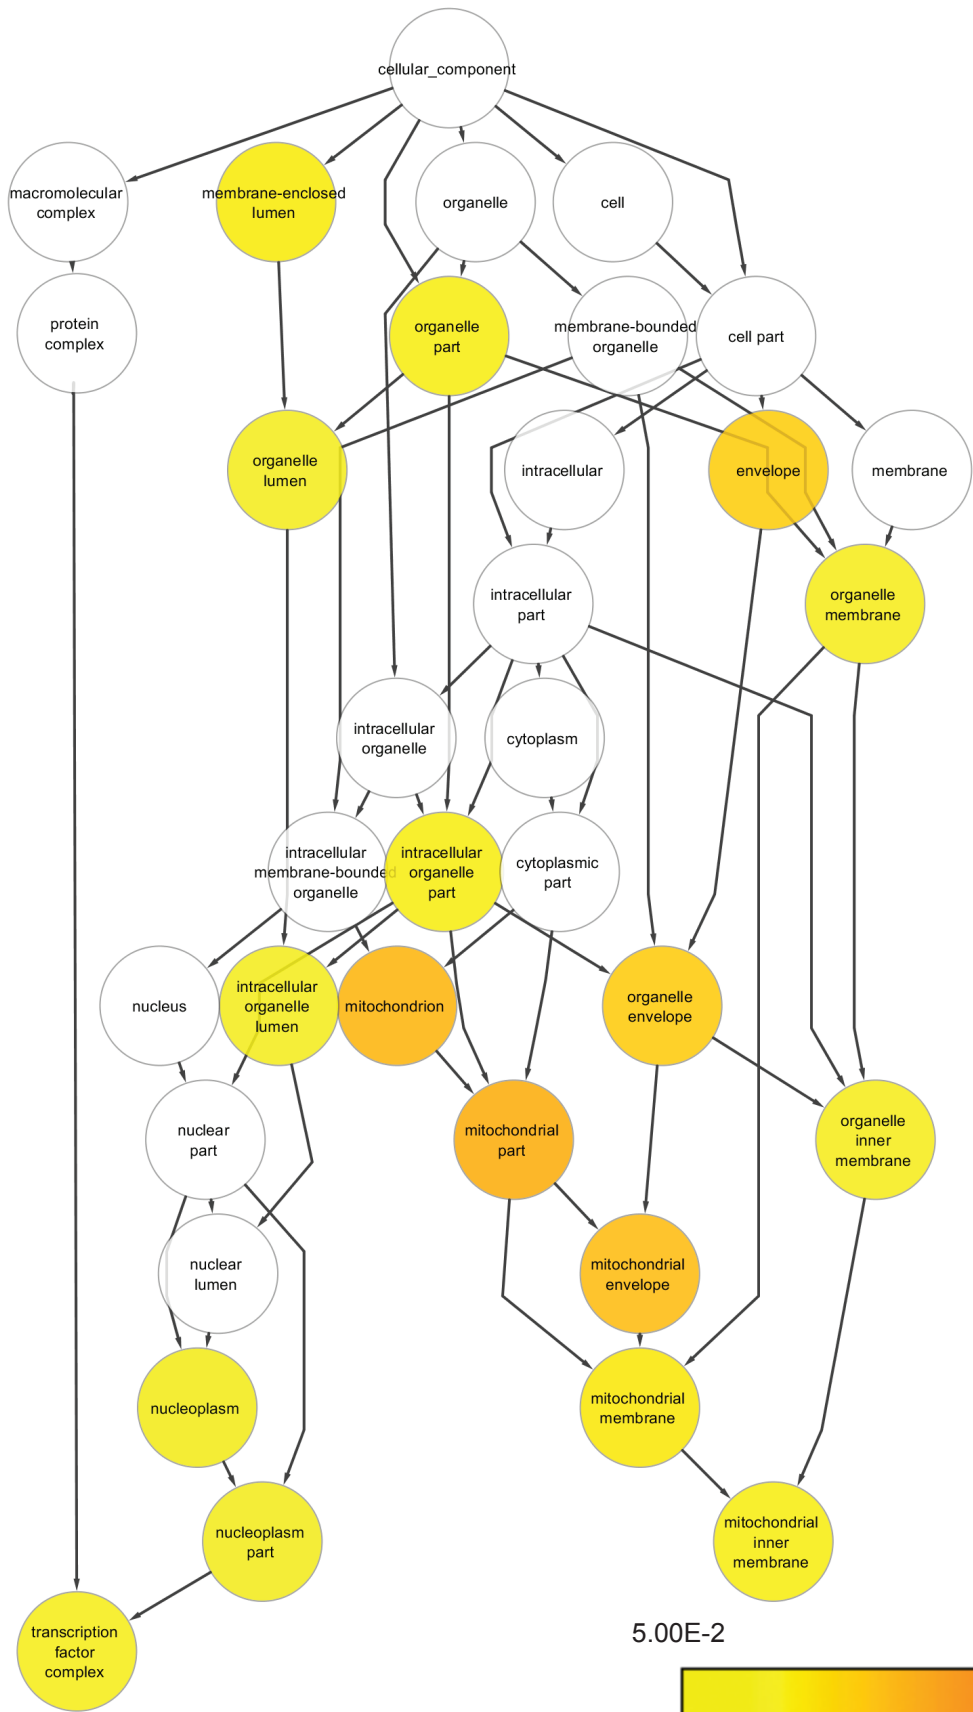

5.00E-2

< 5.00E-7

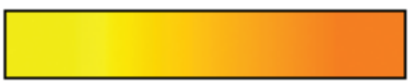

Supplement: pone.0017080.s002.pdf [file pone.0017080.s002.pdf]
